# Supplementary material for: Fluorescence detection of apolipoprotein E gene polymorphisms based on oligonucleotide ligation and magnetic separation
Source: Royal Society of Chemistry journal article supplement (doi:10.1039/d3ay01245j), 2023-01-01
Supplement: d3ay01245j1.pdf [file d3ay01245j1.pdf]

# Fluorescent detection of *Apolipoprotein E* gene polymorphisms based on oligonucleotide ligation and magnetic separation

Wan-Chen Wen, ‡<sup>a</sup>, Yi-Hui Lin, ‡<sup>b</sup>, Tsai-Hui Duh, ‡<sup>c</sup>, Chun-Hsien Chen<sup>d</sup>, Chia-Hsien Feng<sup>\*a,e,f,g</sup>, Yen-Ling Chen<sup>\*a,d,h,i</sup>

<sup>a</sup>Department of Fragrance and Cosmetic Science, College of Pharmacy, Kaohsiung Medical University, Kaohsiung 80708, Taiwan

<sup>b</sup>School of Pharmacy, College of Pharmacy, China Medical University, Taichung 406040, Taiwan

<sup>c</sup>Department of Medicinal and Applied Chemistry, College of Life Science, Kaohsiung Medical University, Kaohsiung 80708, Taiwan

<sup>d</sup>School of Pharmacy, College of Pharmacy, Kaohsiung Medical University, Kaohsiung 80708, Taiwan

<sup>e</sup>College of Professional Studies, National Pingtung University of Science and Technology, Pingtung 91201, Taiwan

<sup>f</sup>Institute of Medical Science and Technology, National Sun Yat-sen University, Kaohsiung 80424, Taiwan

<sup>g</sup>Department of Medical Research, Kaohsiung Medical University Hospital, Kaohsiung 80708, Taiwan

<sup>h</sup>Department of Chemistry and Biochemistry, National Chung Cheng University, Chia-Yi 621301, Taiwan

<sup>i</sup>Center for Nano Bio-Detection, National Chung Cheng University, Chia-Yi 621301, Taiwan

‡ These authors contributed equally to this work.

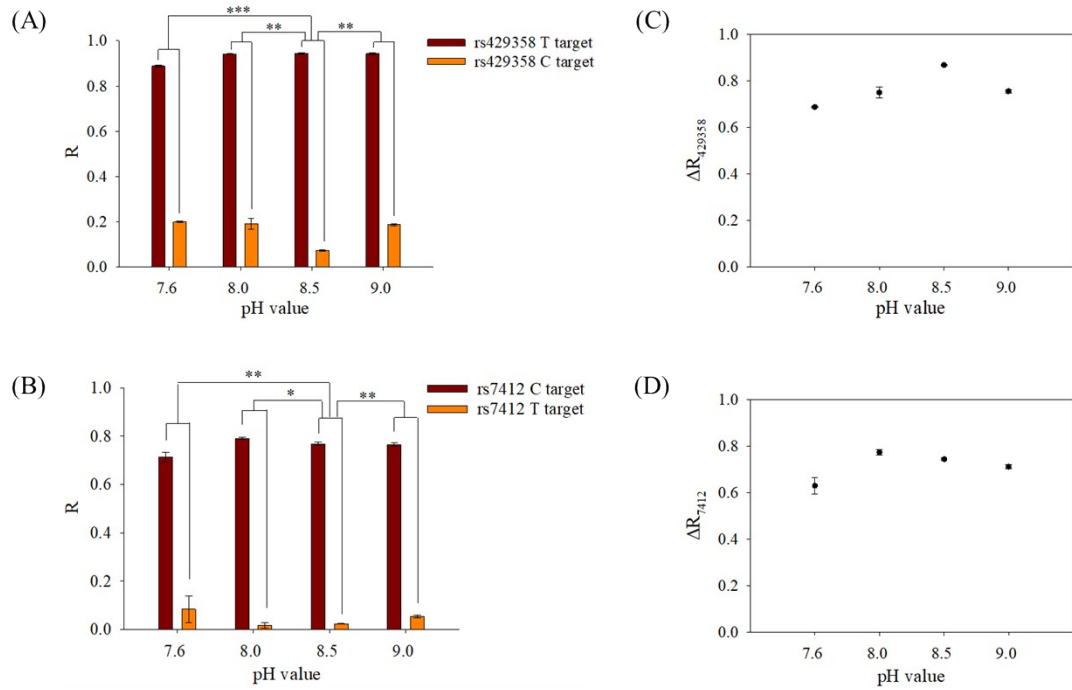

Fig. S1 Effect of pH value of ligase reaction buffer. (A) R-value of rs429358 (B) R-value of rs7412 (C)  $\Delta R$ -value of rs429358 (D)  $\Delta R$ -value of rs7412. R-value:  $F_0 - F_1 / F_0$ .  $F_0$ : Fluorescence intensity in biosensor system without DNA target,  $F_1$ : Fluorescence intensity in biosensor system with DNA target.  $\Delta R$ -value<sub>rs429358</sub>:  $R_{T \text{ target}} - R_{C \text{ target}}$ .  $\Delta R$ -value<sub>rs7412</sub>:  $R_{C \text{ target}} - R_{T \text{ target}}$ . "\*\*\*\*":  $P < 0.001$ , "\*\*\*":  $P < 0.01$ , "\*\*":  $P < 0.05$ .

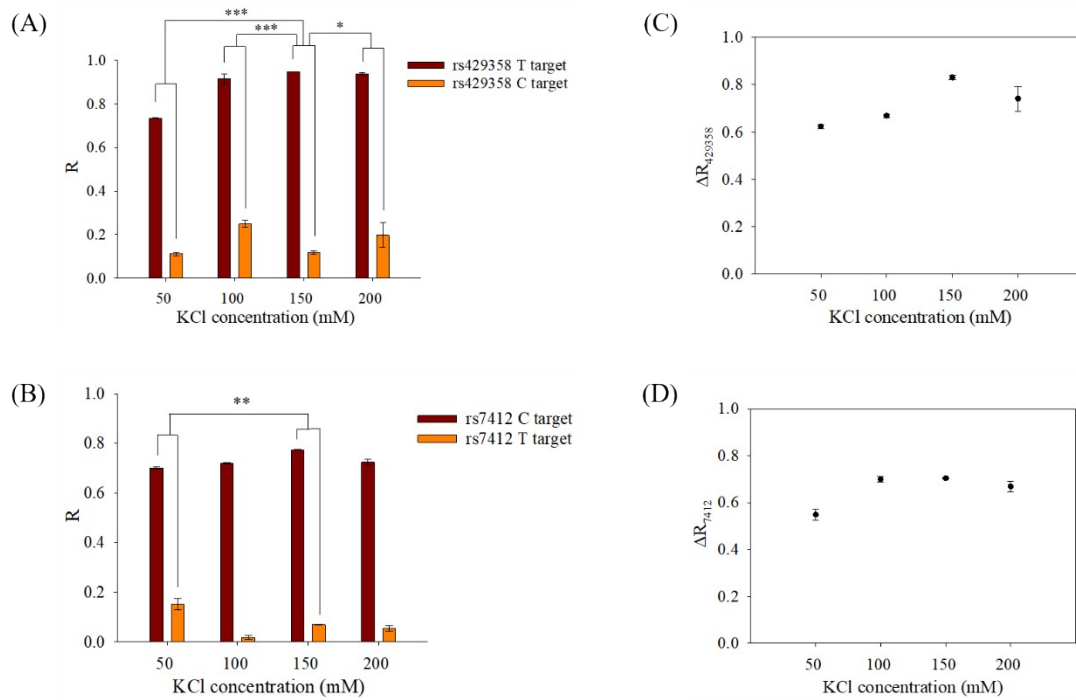

Fig. S2 Effect of KCl concentration on ligase reaction buffer. (A) R-value of rs429358 (B) R-value of rs7412 (C)  $\Delta R$ -value of rs429358 (D)  $\Delta R$ -value of rs7412. R-value:  $F_0 - F_1 / F_0$ .  $F_0$ : Fluorescence intensity in biosensor system without DNA target,  $F_1$ : Fluorescence intensity in biosensor system with DNA target.  $\Delta R$ -value<sub>rs429358</sub>:  $R_{T \text{ target}} - R_{C \text{ target}}$ .  $\Delta R$ -value<sub>rs7412</sub>:  $R_{C \text{ target}} - R_{T \text{ target}}$ . "\*\*\*\*":  $P < 0.001$ , "\*\*\*":  $P < 0.01$ , "\*\*":  $P < 0.05$ .

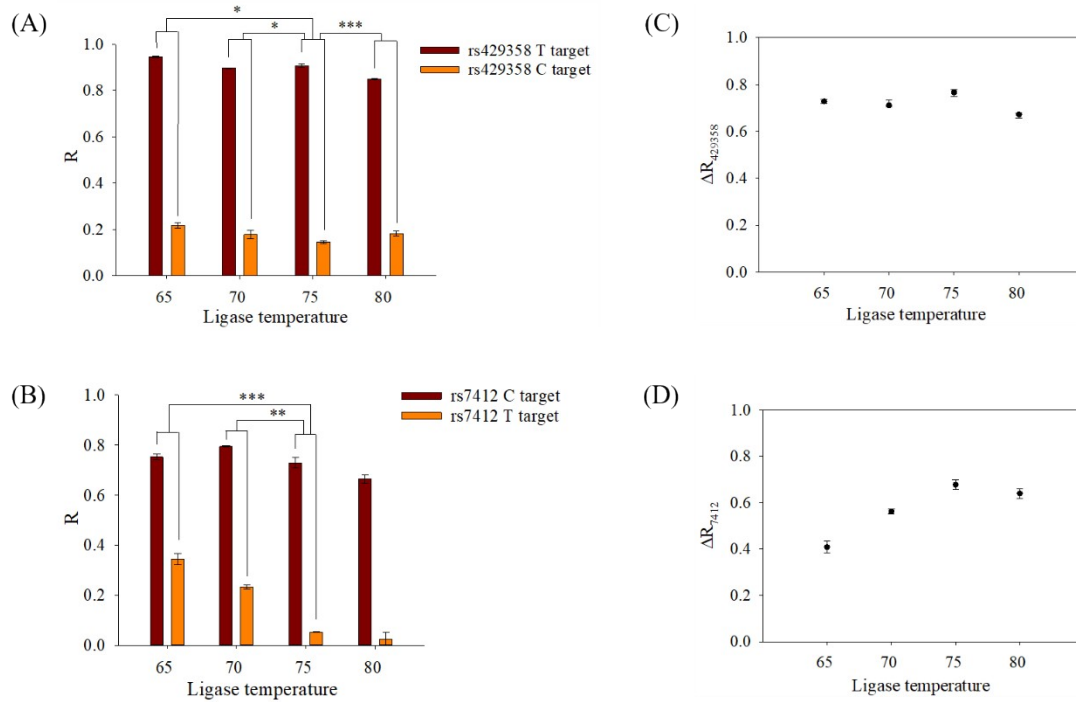

Fig. S3 Effects of temperature on the ligase detection reaction. (A) R-value of rs429358 (B) R-value of rs7412 (C)  $\Delta R$ -value of rs429358 (D)  $\Delta R$ -value of rs7412. R-value:  $F_0 - F_1 / F_0$ .  $F_0$ : Fluorescence intensity in biosensor system without DNA target,  $F_1$ : Fluorescence intensity in biosensor system with DNA target.  $\Delta R$ -value<sub>rs429358</sub>:  $R_{T \text{ target}} - R_{C \text{ target}}$ .  $\Delta R$ -value<sub>rs7412</sub>:  $R_{C \text{ target}} - R_{T \text{ target}}$ . "\*\*\*\*":  $P < 0.001$ , "\*\*\*":  $P < 0.01$ , "\*\*":  $P < 0.05$ .

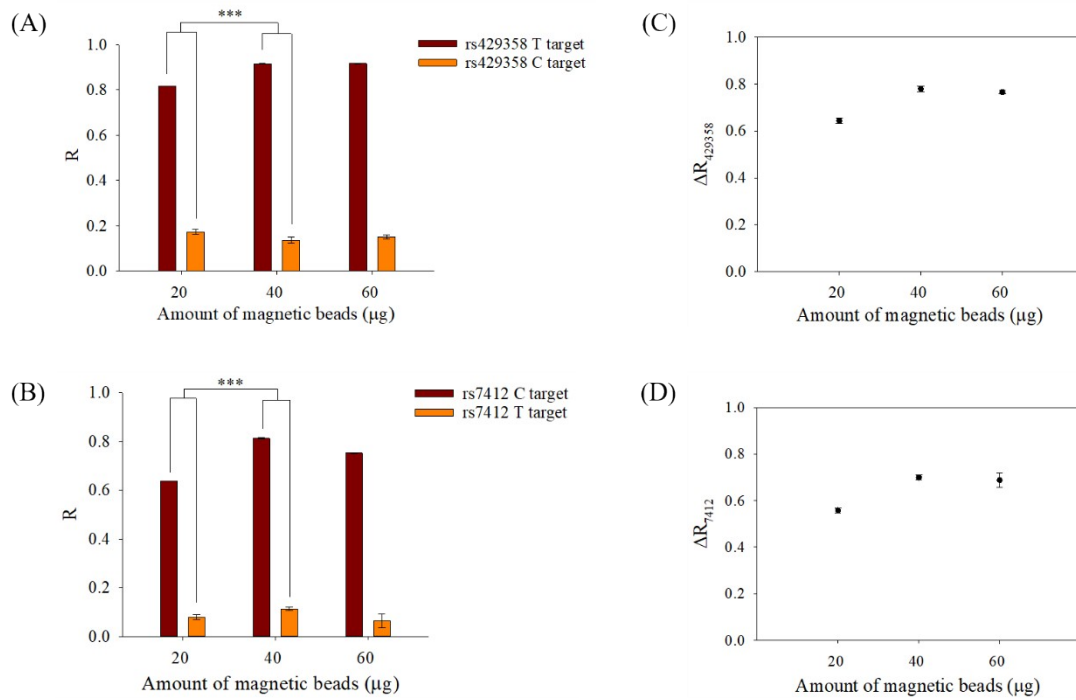

Fig. S4 Effects of magnetic beads amount on oligonucleotide ligation-fluorescent biosensor system. (A) R-value of rs429358 (B) R-value of rs7412 (C)  $\Delta R$ -value of rs429358 (D)  $\Delta R$ -value of rs7412. R-value:  $F_0 - F_1 / F_0$ .  $F_0$ : Fluorescence intensity in biosensor system without DNA target,  $F_1$ : Fluorescence intensity in biosensor system with DNA target.  $\Delta R$ -value<sub>rs429358</sub>:  $R_{T \text{ target}} - R_{C \text{ target}}$ .  $\Delta R$ -value<sub>rs7412</sub>:  $R_{C \text{ target}} - R_{T \text{ target}}$ . "\*\*\*\*":  $P < 0.001$ , "\*\*\*":  $P < 0.01$ , "\*\*":  $P < 0.05$ .

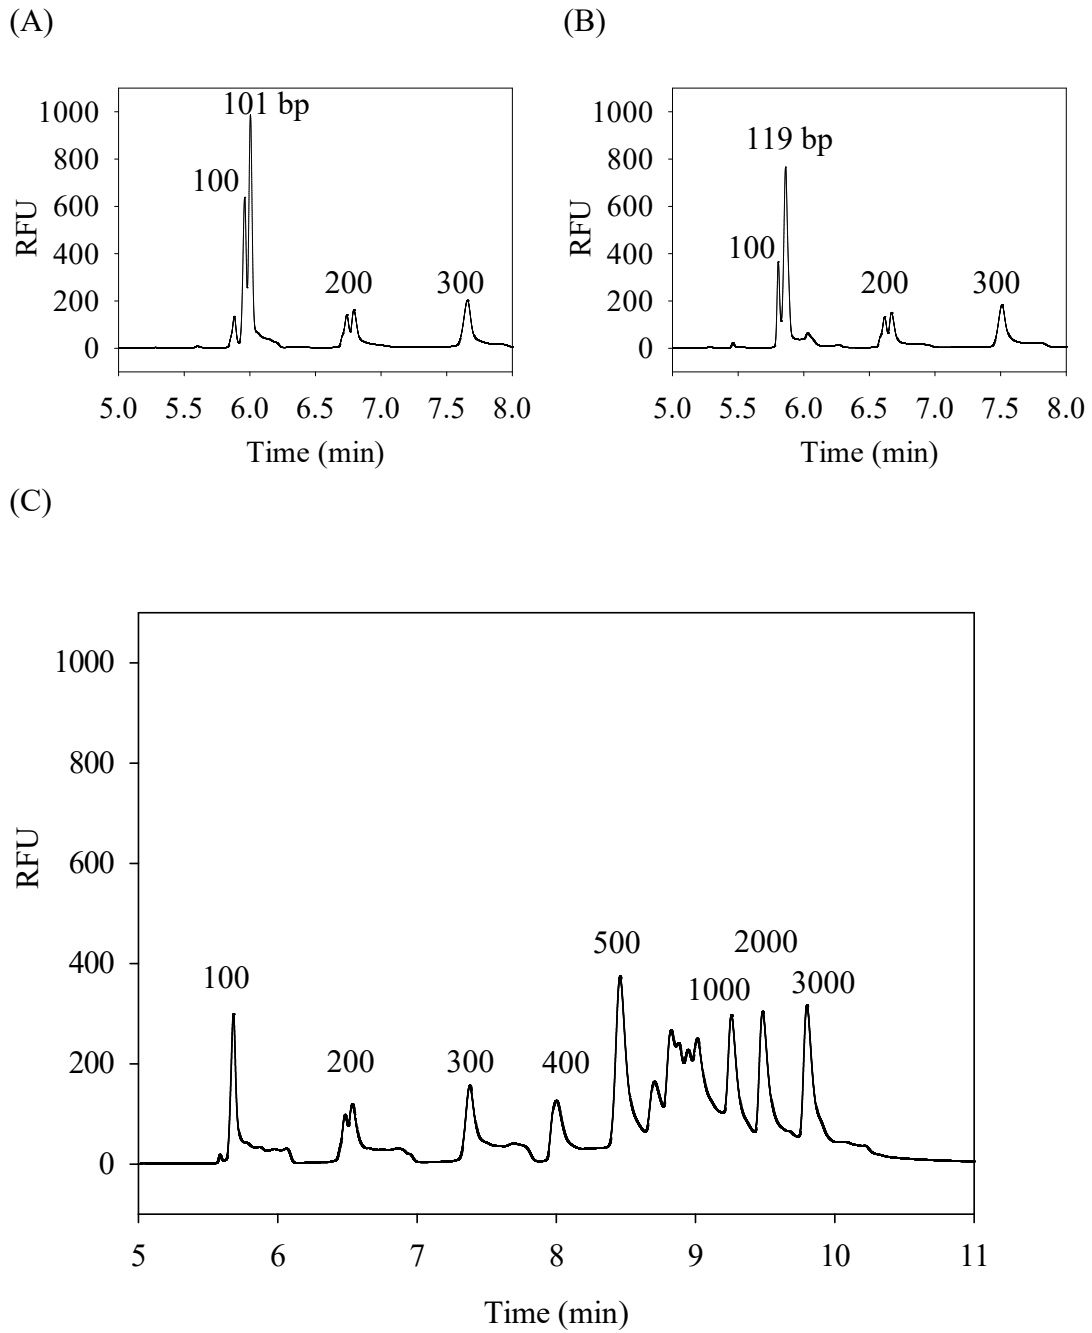

Fig. S5. (A) The electropherogram of PCR product of rs429358 (101 bp) with DNA ladder. (B) The electropherogram of PCR product of rs7412 (119 bp) with DNA ladder. (C) The electropherogram of DNA ladder. CE condition: DB-17 capillary, 30 cm (effective length) $\times$ 100  $\mu$ m I.D., filled with 0.6% (w/v) PEO in 1 $\times$ TBE containing 1 mM YOPRO-1 before sample injection. Injection -10 kV, 30 s; temperature, 25 $^{\circ}$ C.

Table S1 Probe design for discriminating allele-specific sites

| Name                     | Sequence (5'-3')                                         | Tm (°C) |
|--------------------------|----------------------------------------------------------|---------|
| rs429358-P1 probe (5'PN) | p- <u>A</u> CACGT CCTCC ATGTC CGCGC TTT TTT TTT -Biotin  | 61.6    |
| rs429358-F1 probe        | FAM-TACTG CACCA GGCGG CCGC                               | 59.7    |
| rs429358-P2 probe        | p-CACGT CCTCC ATGTC CGCGC TTT TTT TTT -Biotin            | 61.5    |
| rs429358-F2 probe (3'N)  | FAM-TACTG CACCA GGCGG CCGC <u>A</u>                      | 60.0    |
| rs7412-P1 probe (5'PN)   | p- <u>G</u> CCTTCT GCAGG TCATC GGCAT TTT TTT TTT -Biotin | 58.9    |
| rs7412-F1 probe          | FAM-GCCTG GTACA CTGCC AGGC                               | 57.6    |
| rs7412- P2 probe         | p-CTTCT GCAGG TCATC GGCAT TTT TTT TTT -Biotin            | 57.3    |
| rs7412-F2 probe (3'N)    | FAM-GCCTG GTACA CTGCC AGGC <u>G</u>                      | 60.0    |
